# Supplementary material for: Transition-Metal-Free Access to 2-Subsituted Indolines from Indoles via Dearomative Nucleophilic Addition Using Two-Molecule Organic Photoredox Catalysts
Source: MDPI journal article supplement (doi:10.3390/photochem1030027), 2021-11-01

## **Supplementary Materials**

### **Transition-metal-free access to 2-substituted indolines from indoles via dearomative nucleophilic addition using two-molecule photoredox catalysts**

Yosuke Tanaka, Takumi Ikeda, Yasuhiro Nachi, Taisei Mizuno, Kousuke Maeda, Chisato Sakamoto, Mugen Yamawaki, Toshio Morita, Yasuharu Yoshimi\*

Department of Applied Chemistry and Biotechnology, Graduate School of Engineering, University of Fukui, 3-9-1 Bunkyo, Fukui 910-8507, Japan

Department of Chemistry and Biology, National Institute of Technology, Fukui College, Genshi-cho, Fukui 916-8507, Japan

E-mail of corresponding author: [yyoshimi@u-fukui.ac.jp](mailto:yyoshimi@u-fukui.ac.jp)

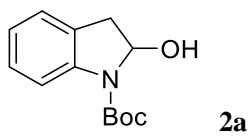

<sup>1</sup>H

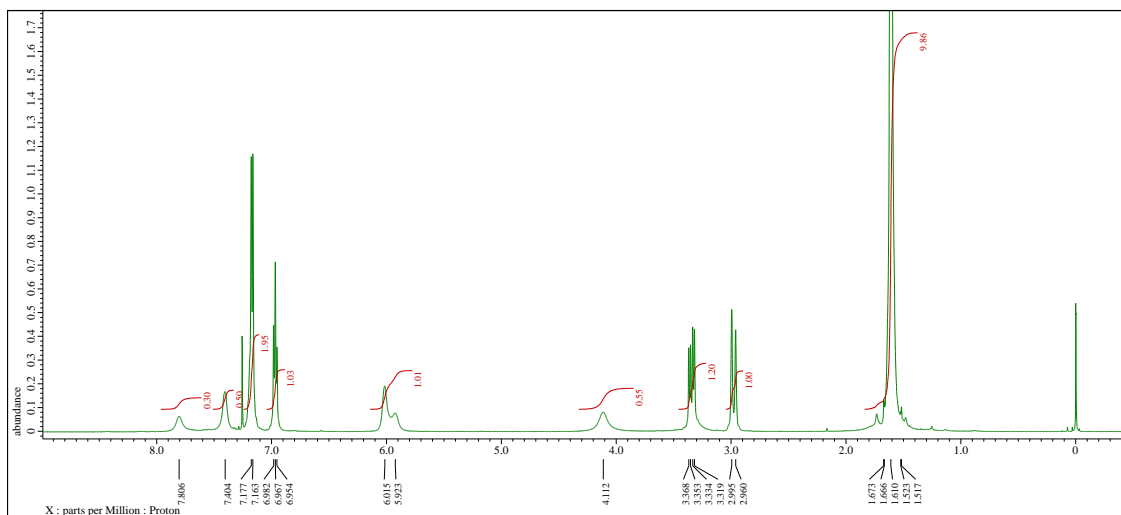

<sup>13</sup>C

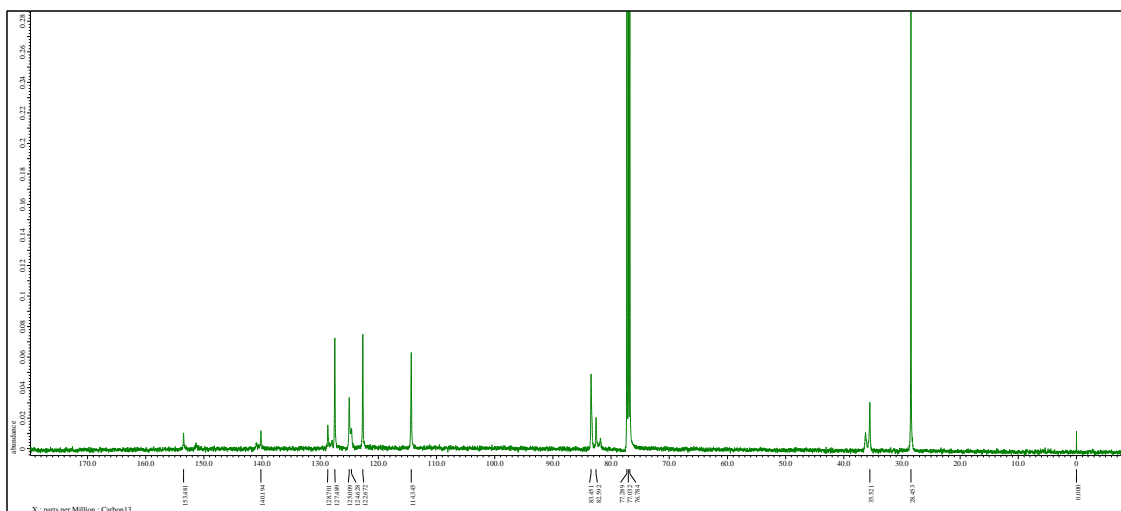

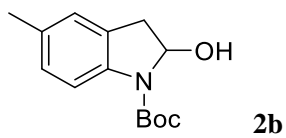

<sup>1</sup>H

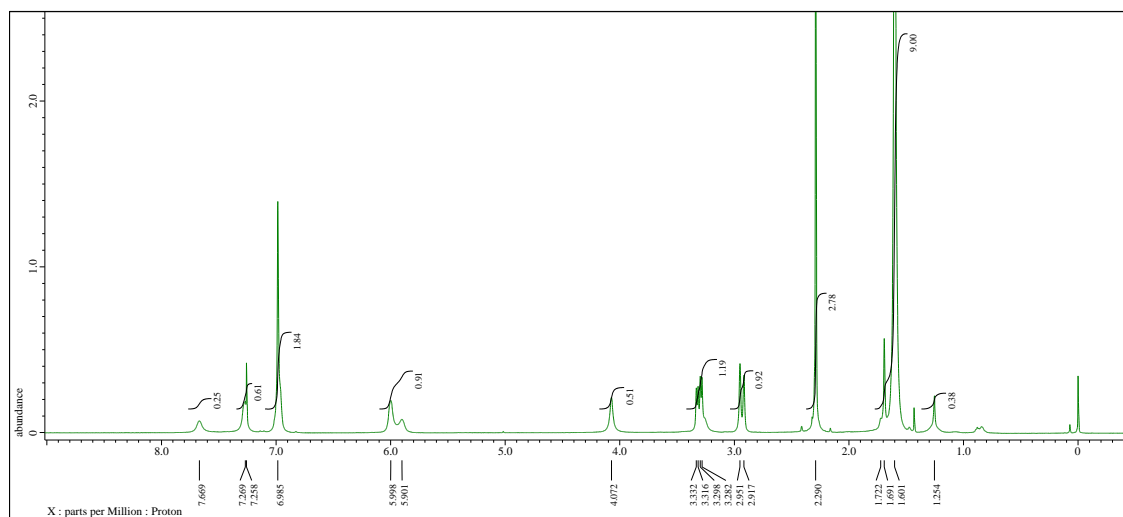

<sup>13</sup>C

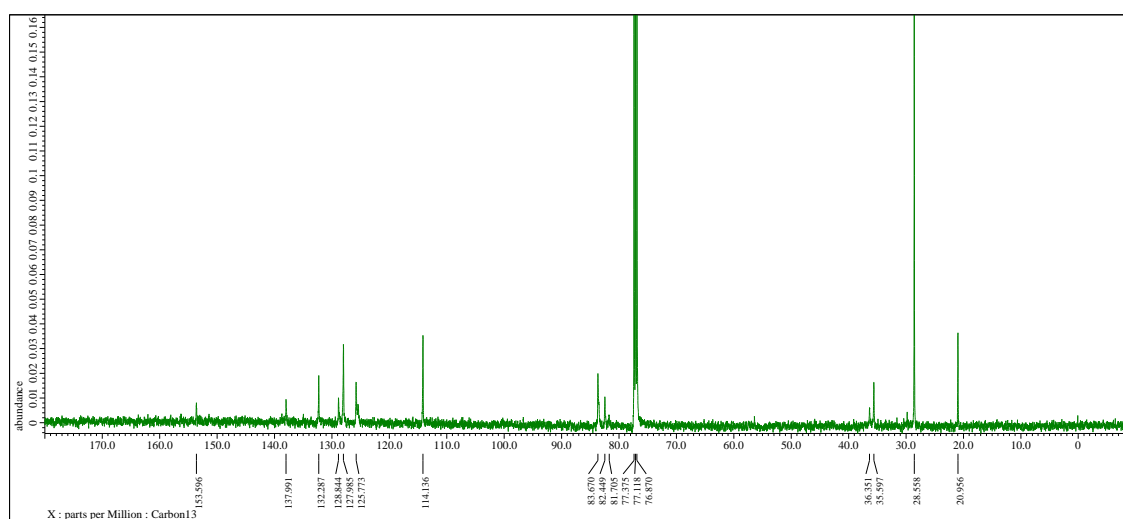

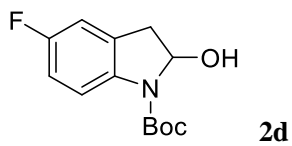

<sup>1</sup>H

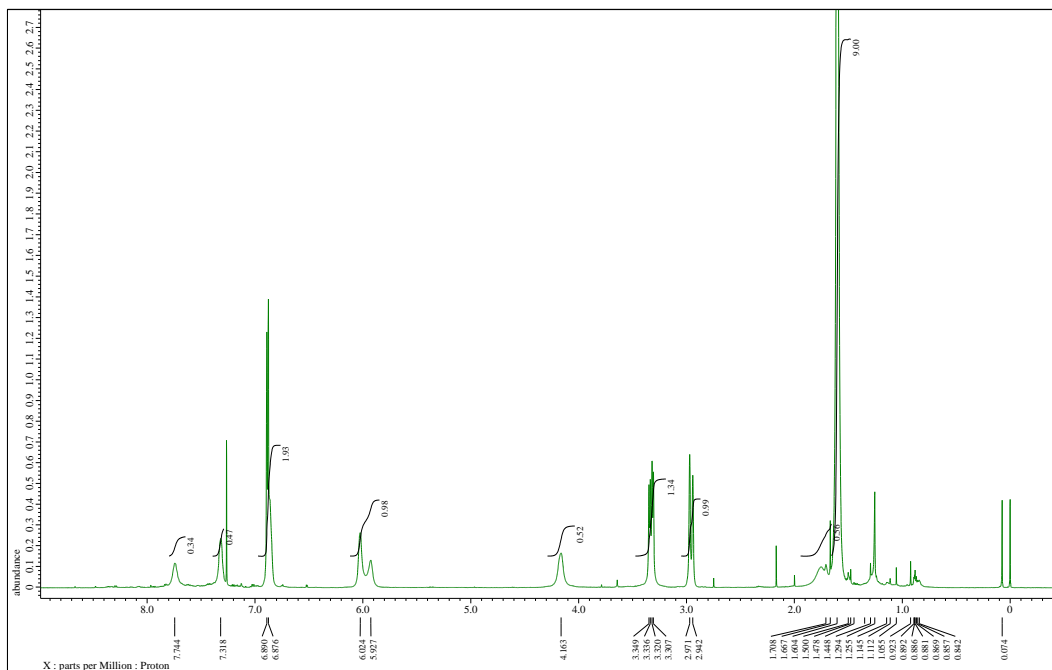

<sup>13</sup>C

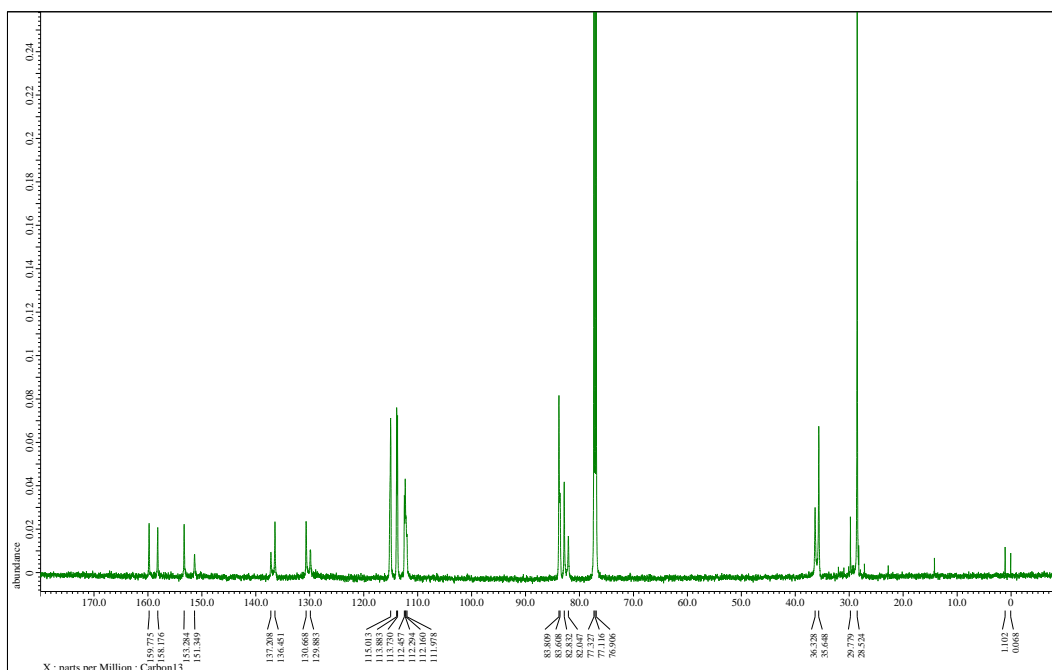

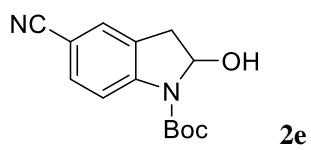

<sup>1</sup>H

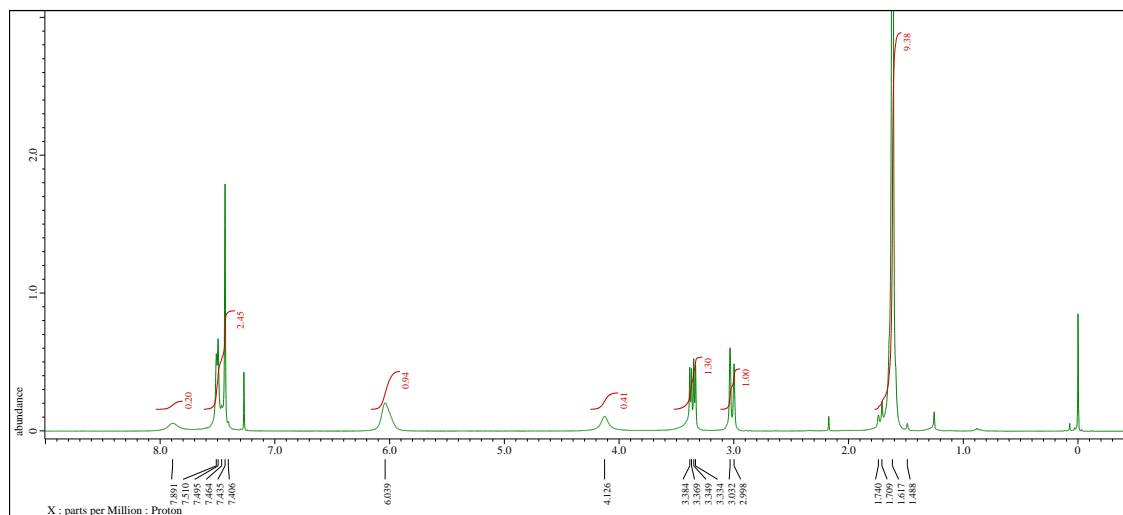

<sup>13</sup>C

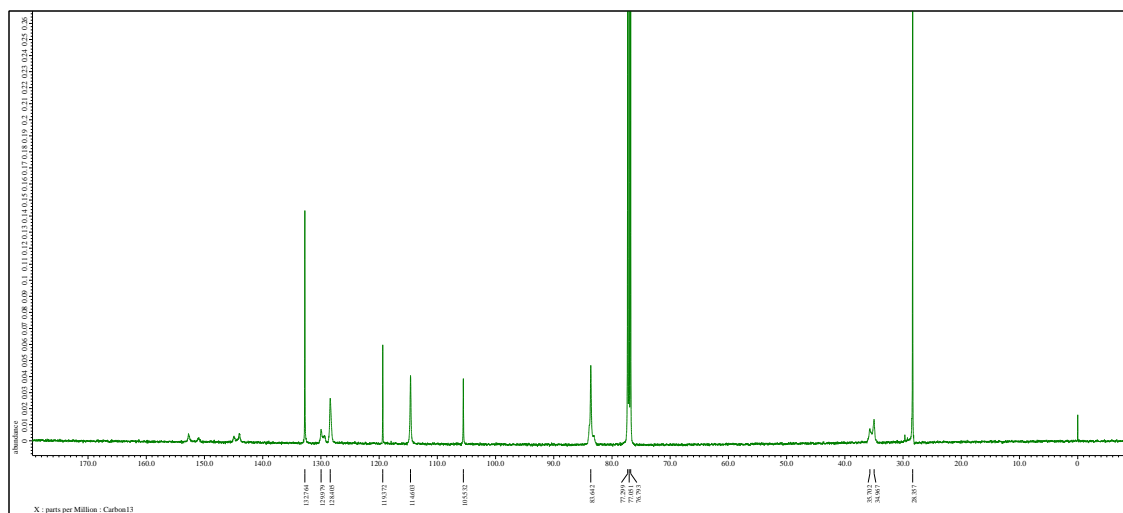

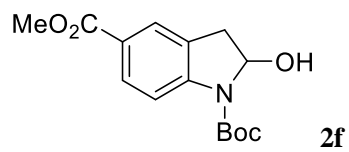

<sup>1</sup>H

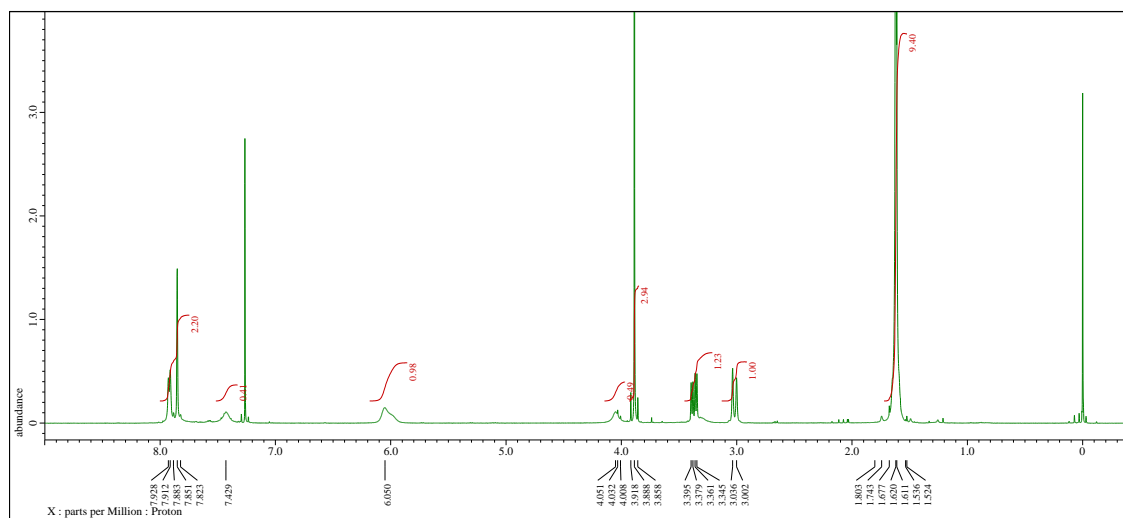

<sup>13</sup>C

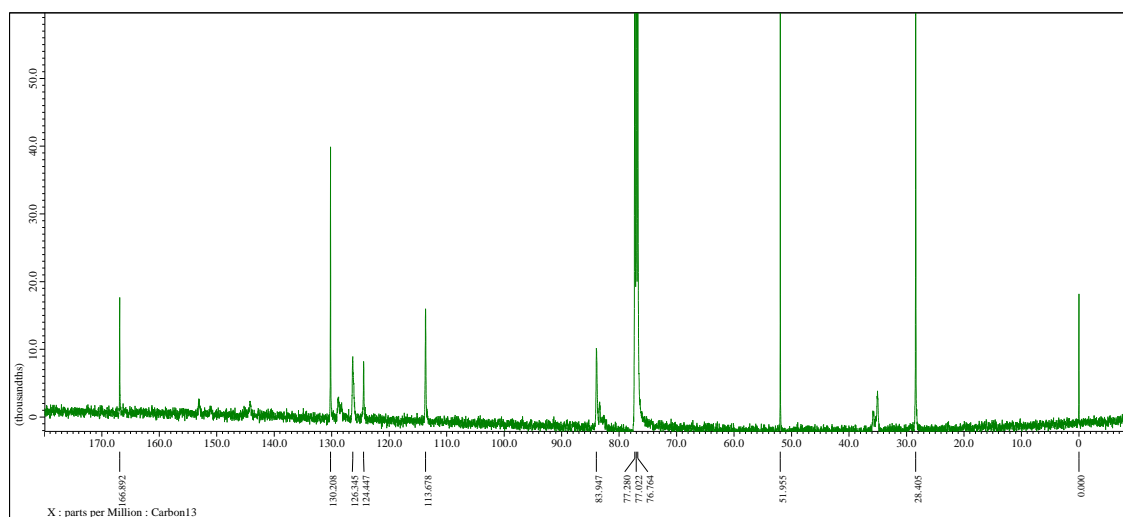

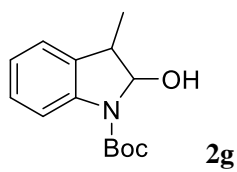

<sup>1</sup>H

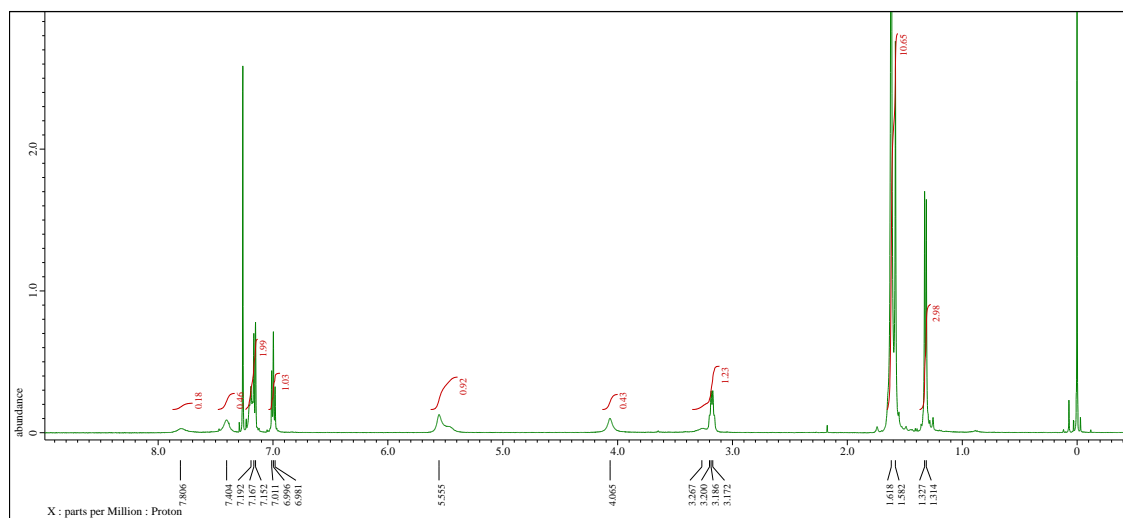

<sup>13</sup>C

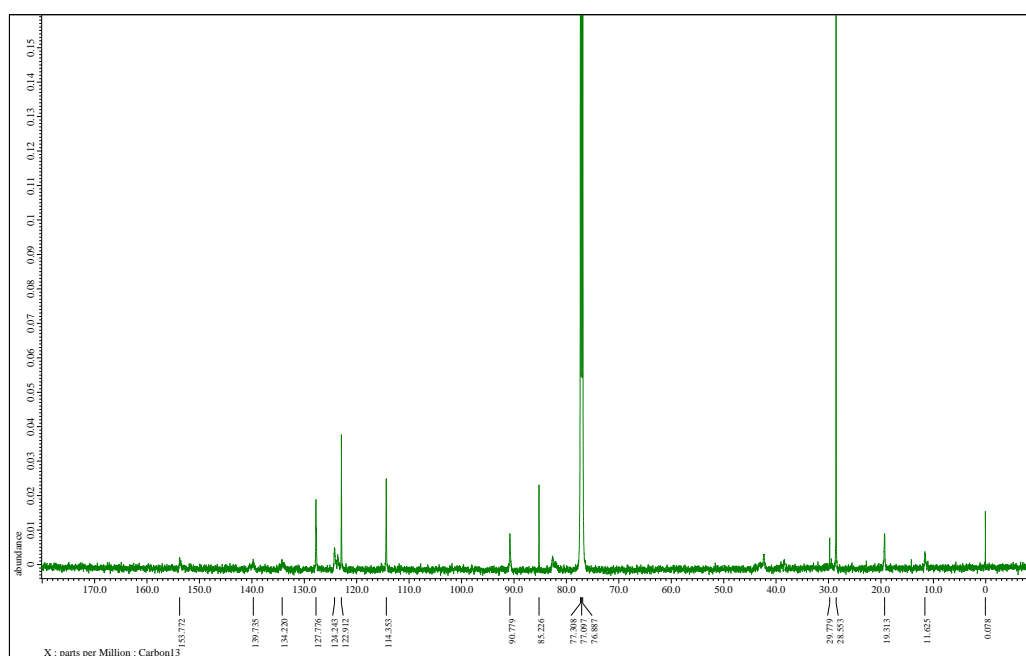

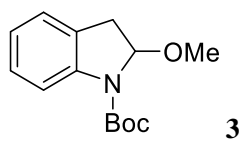

<sup>1</sup>H

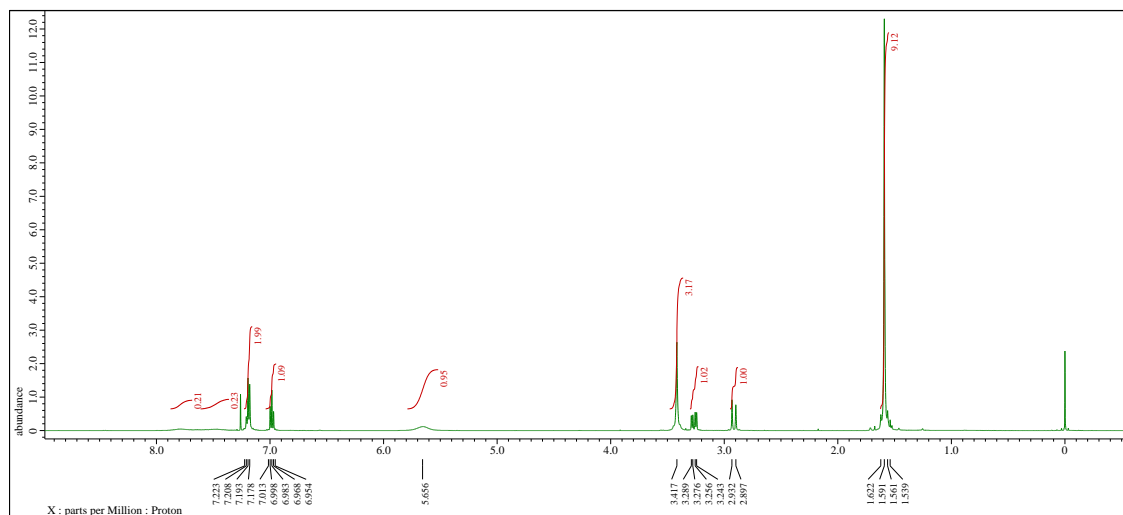

<sup>13</sup>C

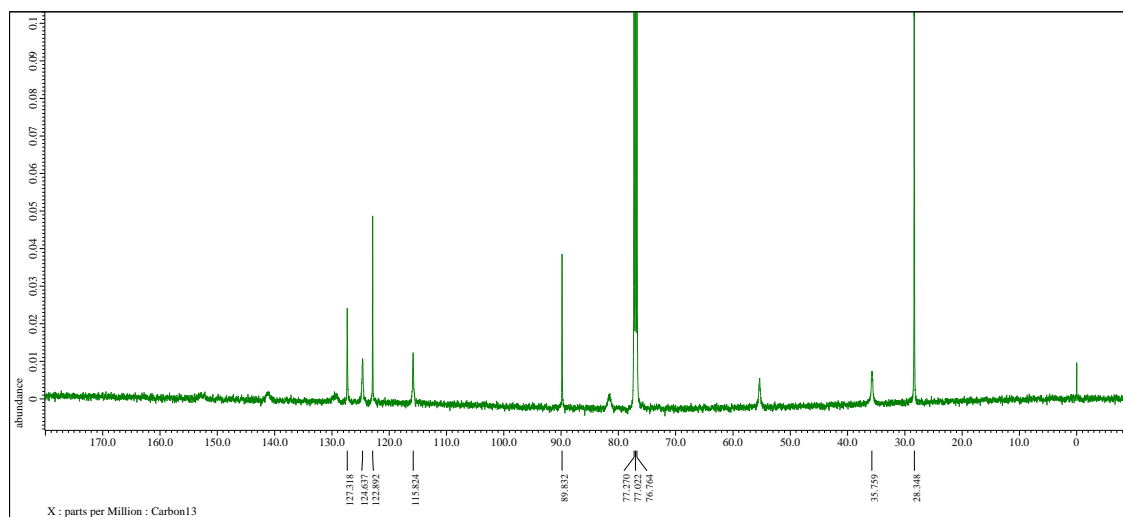



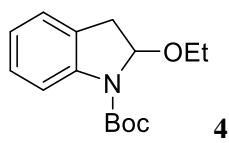

<sup>1</sup>H

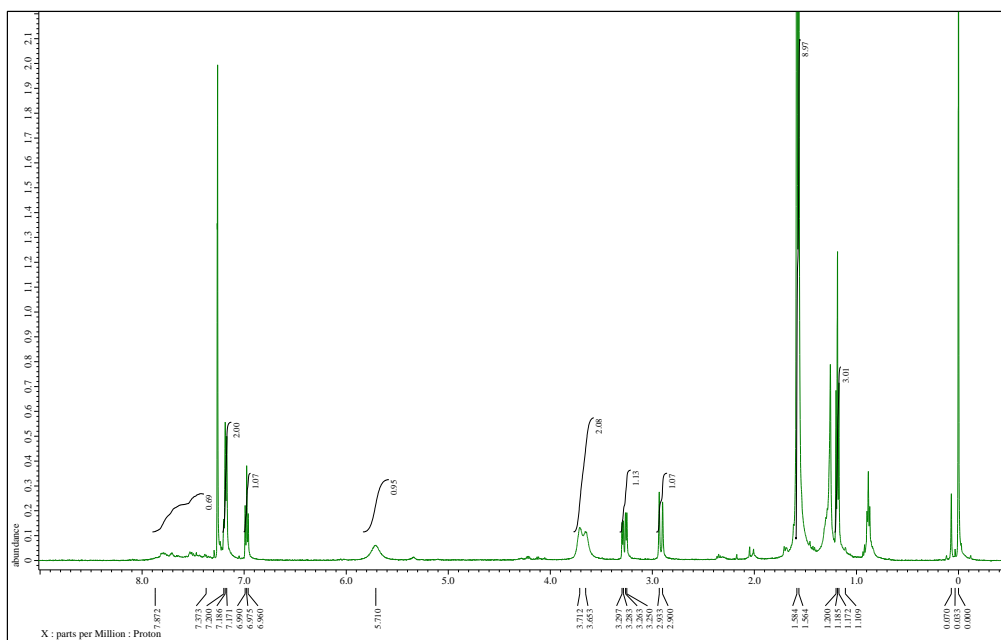

<sup>13</sup>C

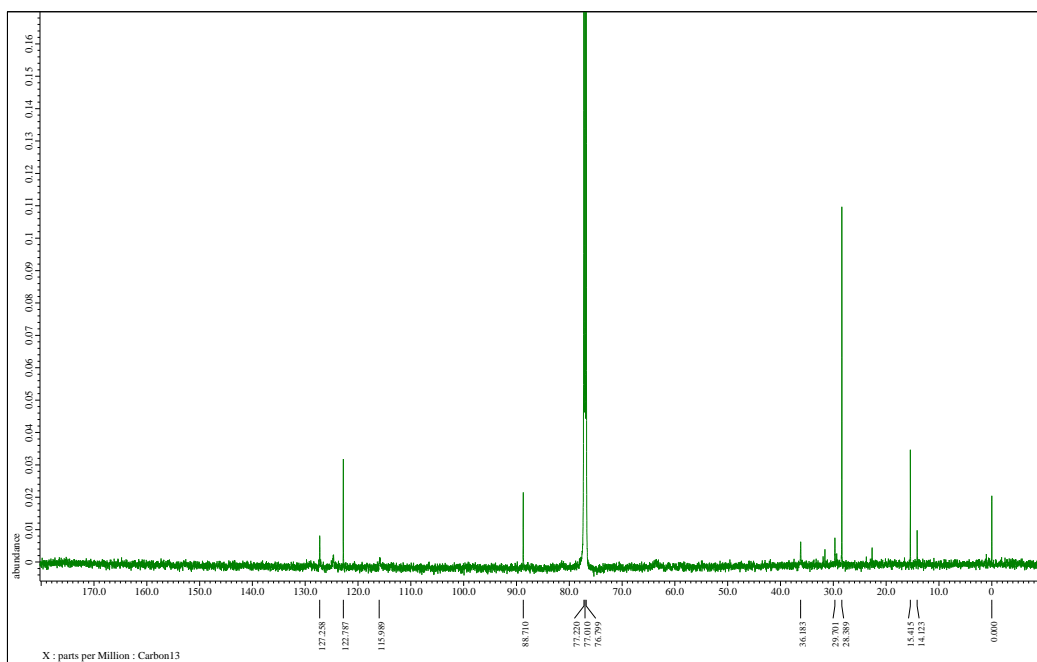

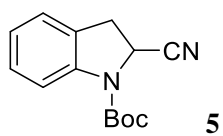

<sup>1</sup>H

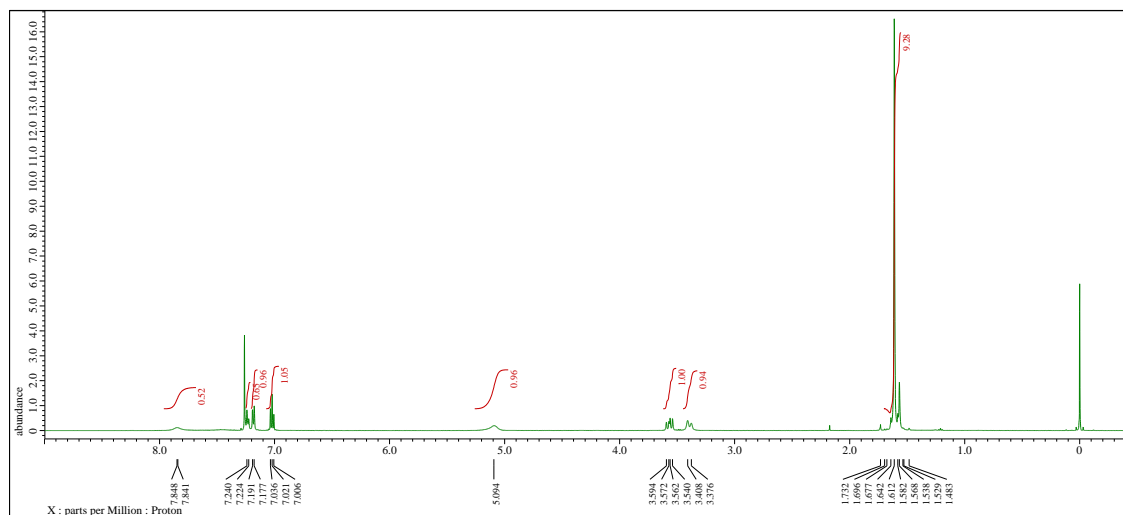

<sup>13</sup>C

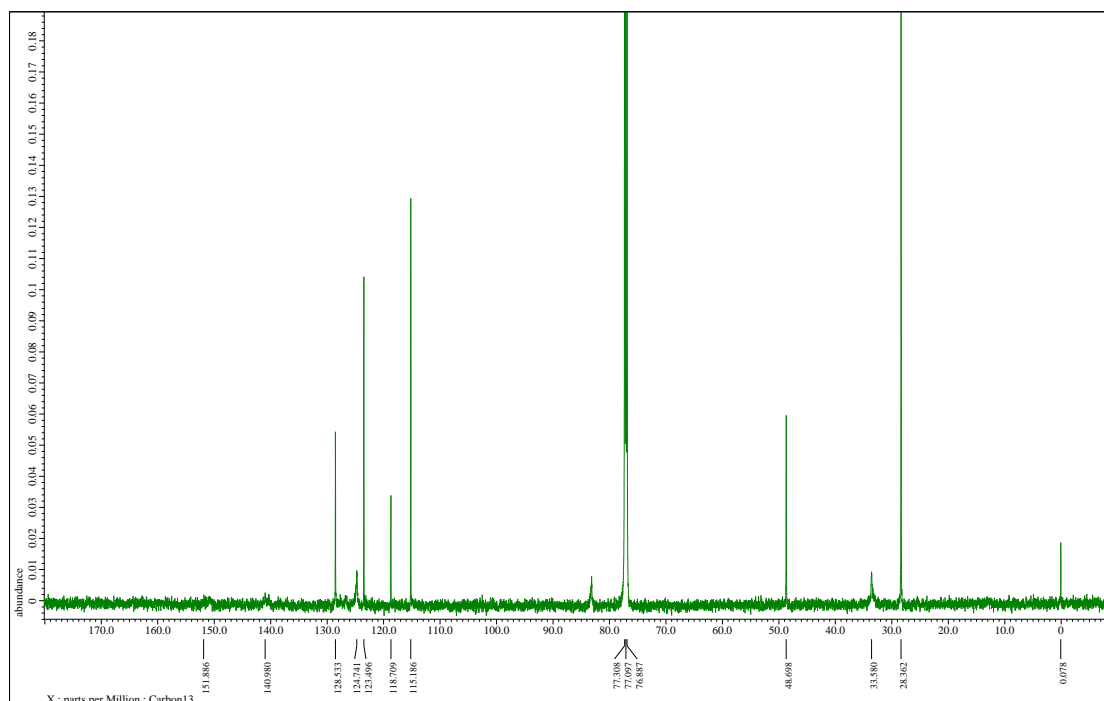

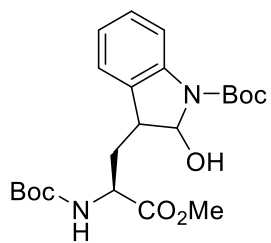

$^1\text{H}$

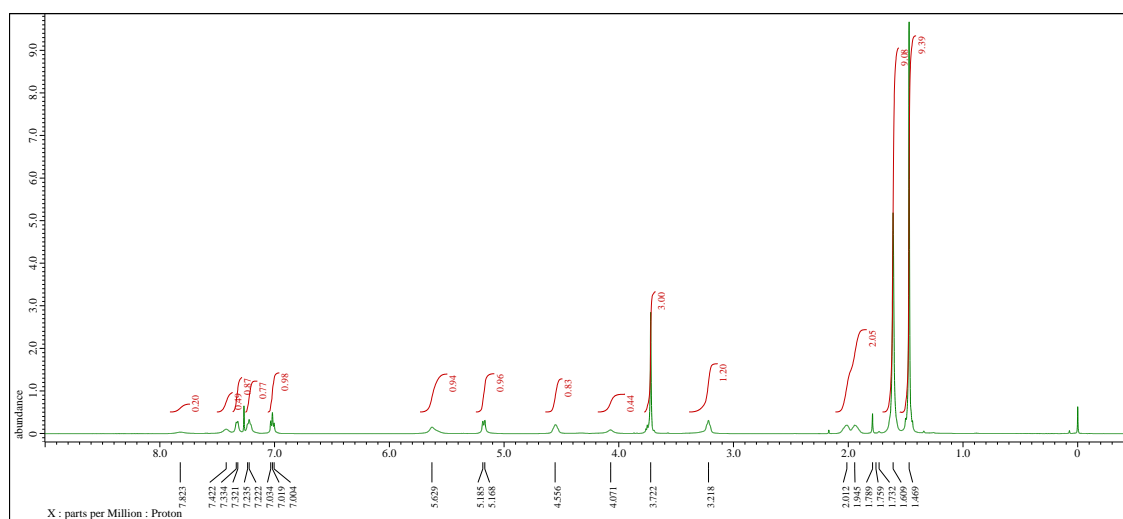

$^{13}\text{C}$

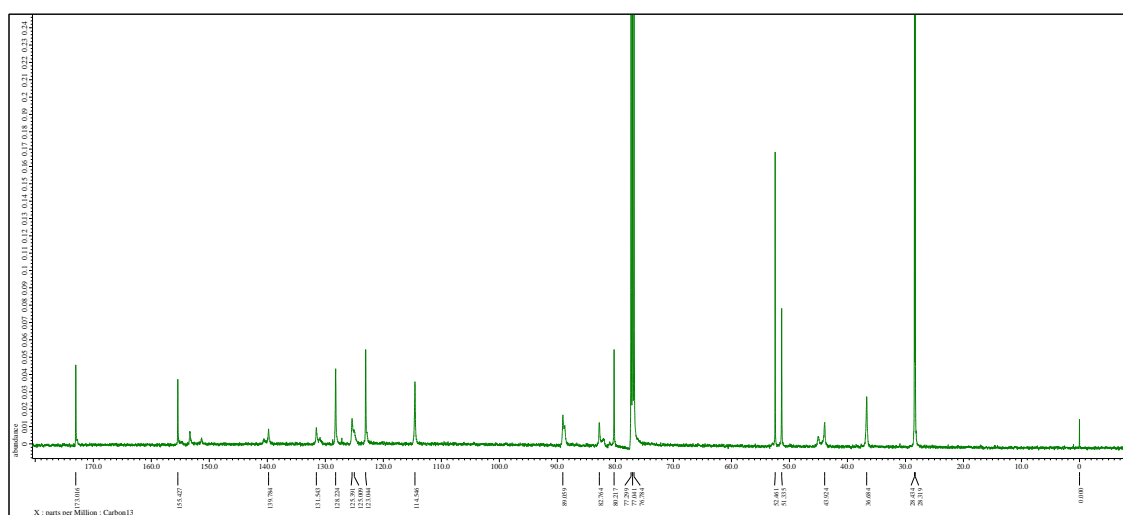



$^1\text{H}$

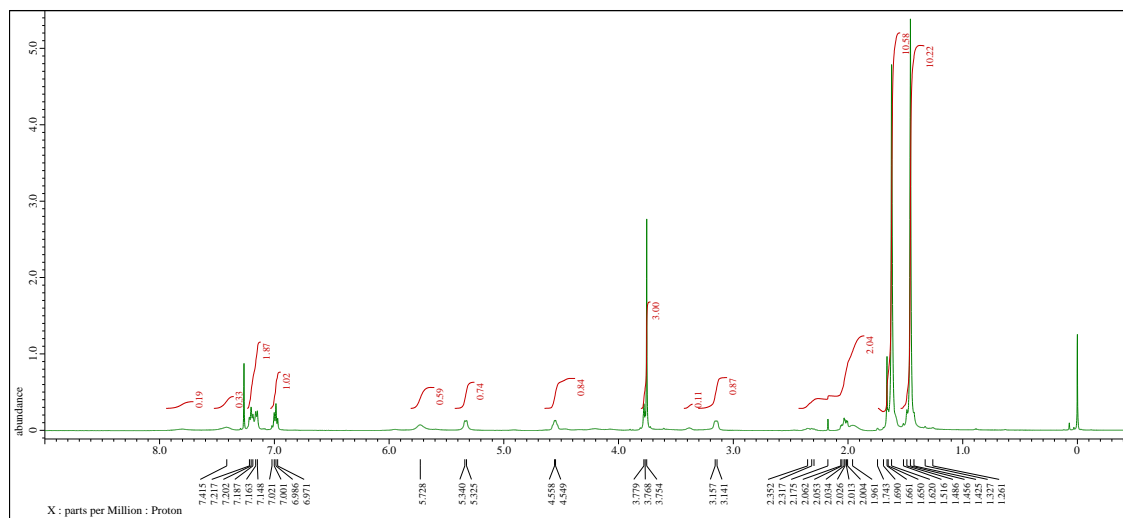

$^{13}\text{C}$

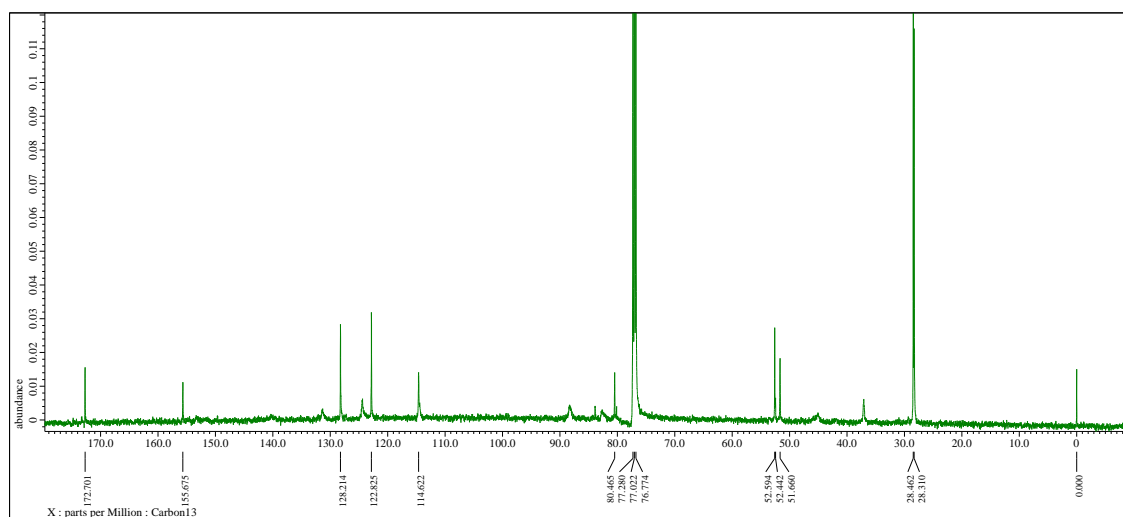

Supplement: s1 [file s1]
